# Supplementary material
Source: PubMed Central journal article supplement (PMC2672596)
Supplement: pbio.1000003.sg004.pdf [file pbio.1000003.sg004.pdf]

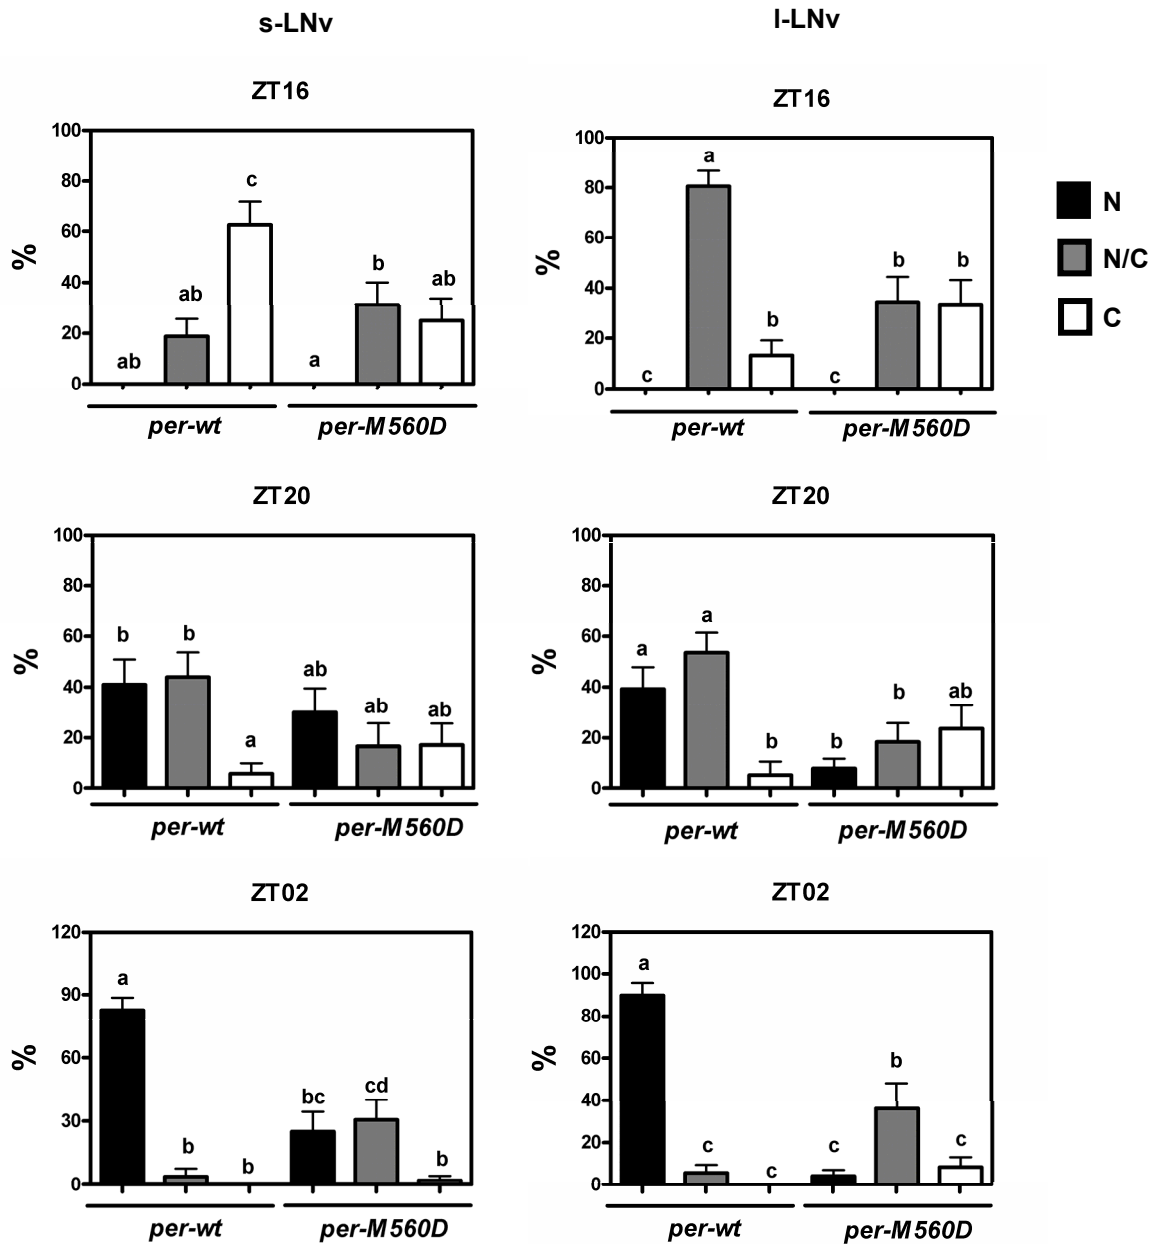

**Figure S4. Quantification of PER subcellular localization.**

Confocal images as shown in Figure 6 were quantified as follows: Percentages were calculated by dividing the number of PER positive neurons showing staining in nucleus (N), in both nucleus and cytoplasm (N/C) or cytoplasm (C), by that of PDF positive neurons for the individual hemispheres of each genotype. Mean and SEM was then calculated and plotted for each genotype and ZT. *One-way ANOVA* and the Bonferroni post-test were performed to compare the difference among all groups at a given time point. Identical alphabetic symbols were assigned to individual groups based on statistical significance ( $p > 0.05$ ). Groups with the same symbol are not significantly different. For number of brains analyzed see Figure 6.
